# Supplementary material
Source: PubMed Central journal article supplement (PMC3084690)

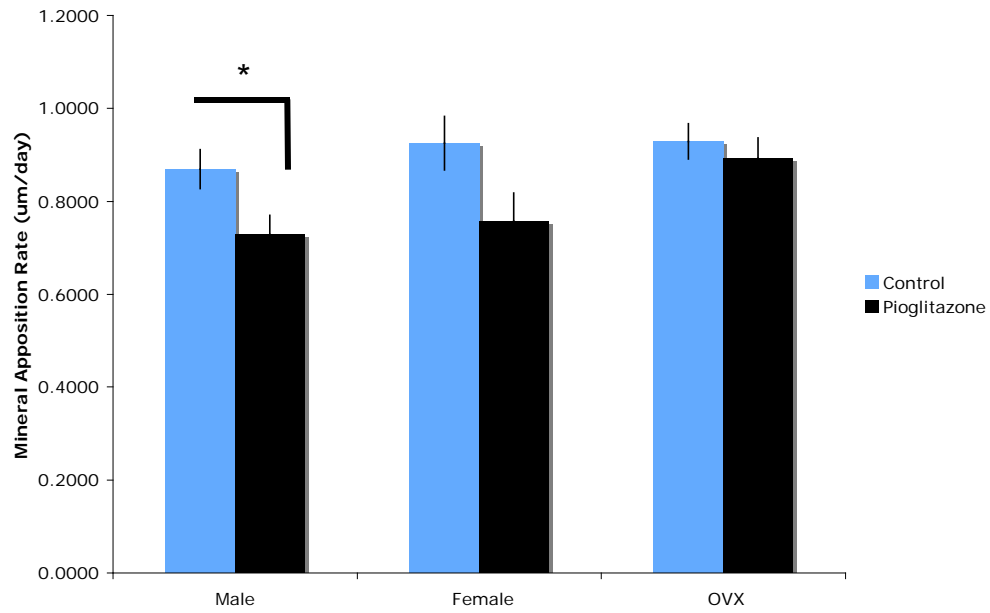

## Supplemental Figure 1

Mineral apposition rate for male, female, and OVX HFD mice treated with vehicle or pioglitazone\* =  $p < 0.05$

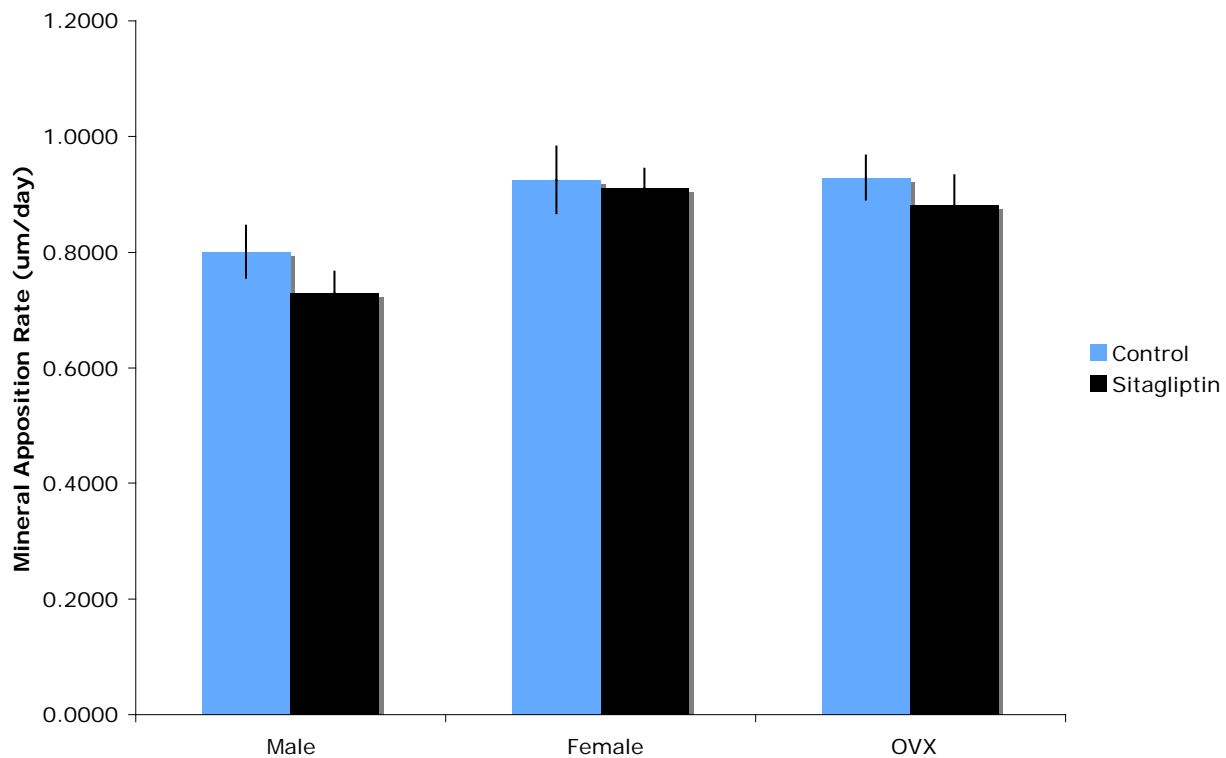

## Supplementary Figure 2

Mineral apposition rate for male, female, and OVX HFD mice treated with vehicle or sitagliptin \*=  $p < 0.05$

Trabecular Mineralization Profiles of Male Mice

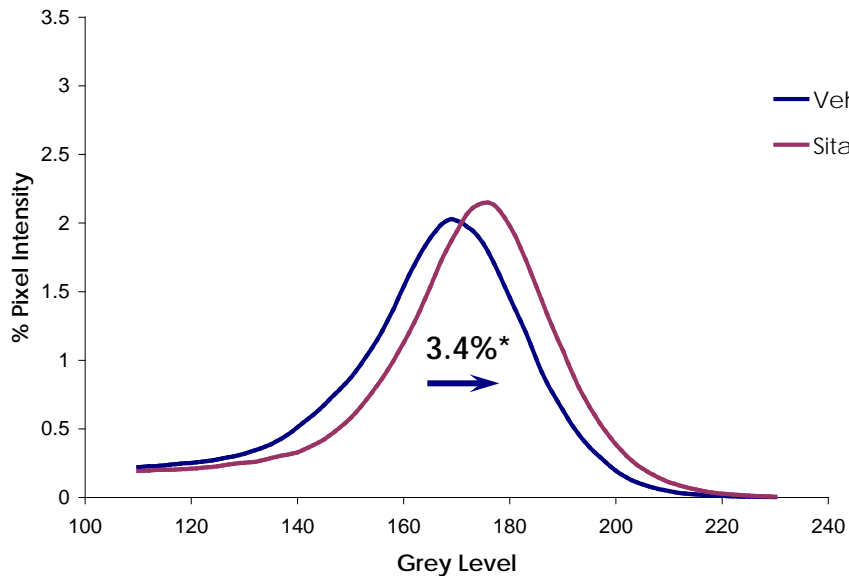

Trabecular Mineralization Profiles of Female Mice

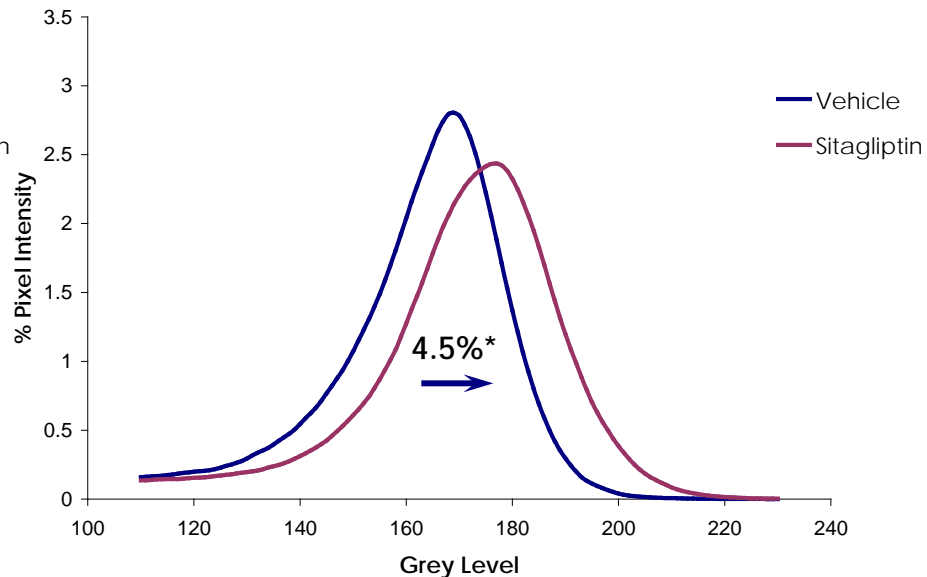

Trabecular Mineralization Profiles of OVX Mice

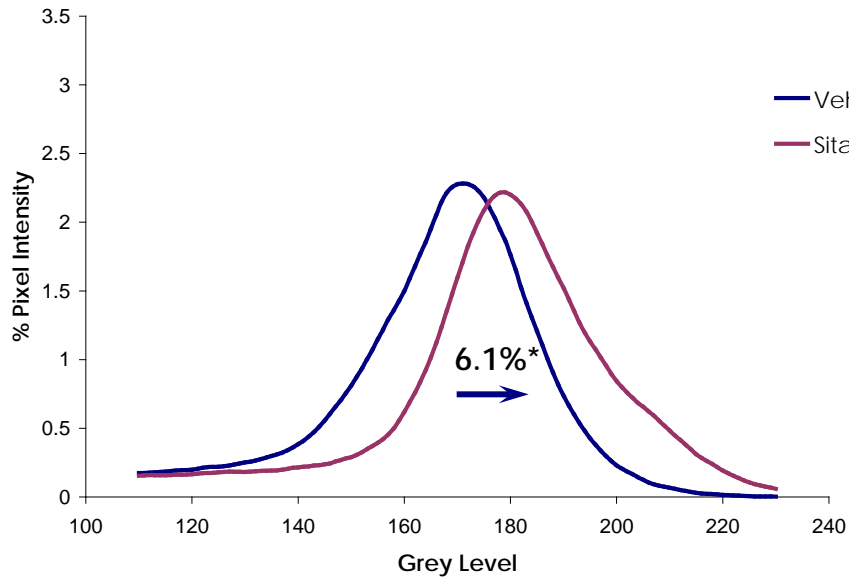

Average mineralization profiles for trabecular bone area in sitagliptin- vs. vehicle-treated HFD mice  
\* =  $p < .05$  vehicle vs. sitagliptin

## Body weight in *Dpp4*<sup>+/+</sup> and *Dpp4*<sup>-/-</sup> mice

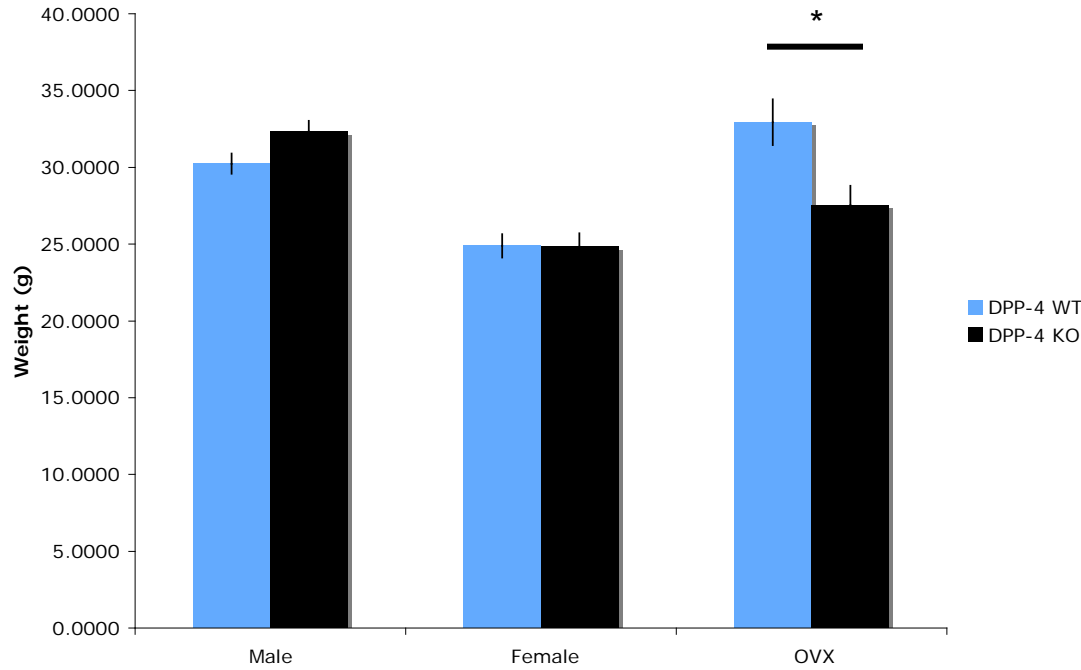

## Supplementary Figure 4

Body weight in male and female littermate *Dpp4*<sup>+/+</sup> and *Dpp4*<sup>-/-</sup> 7 month old mice \* = p<.05, DPP-4 WT vs. DPP-4 KO

Trabecular Mineralization Profiles of Male Mice

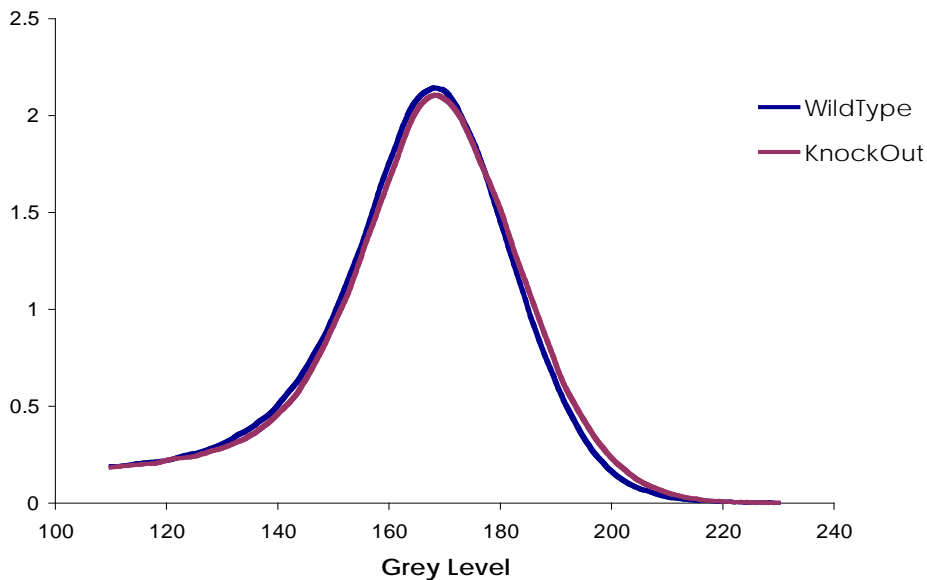

Trabecular Mineralization Profiles of Female

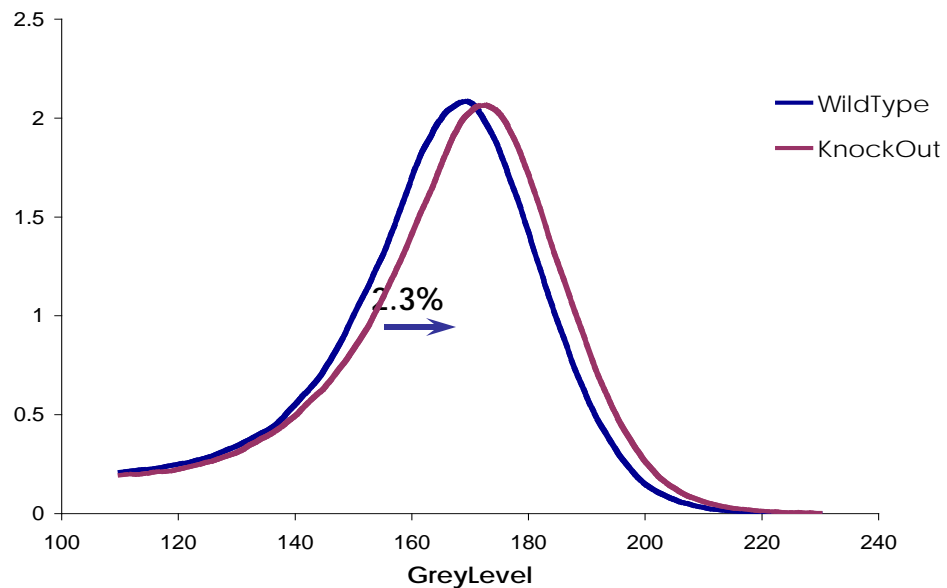

Trabecular Mineralization Profiles of OVX Female Mice

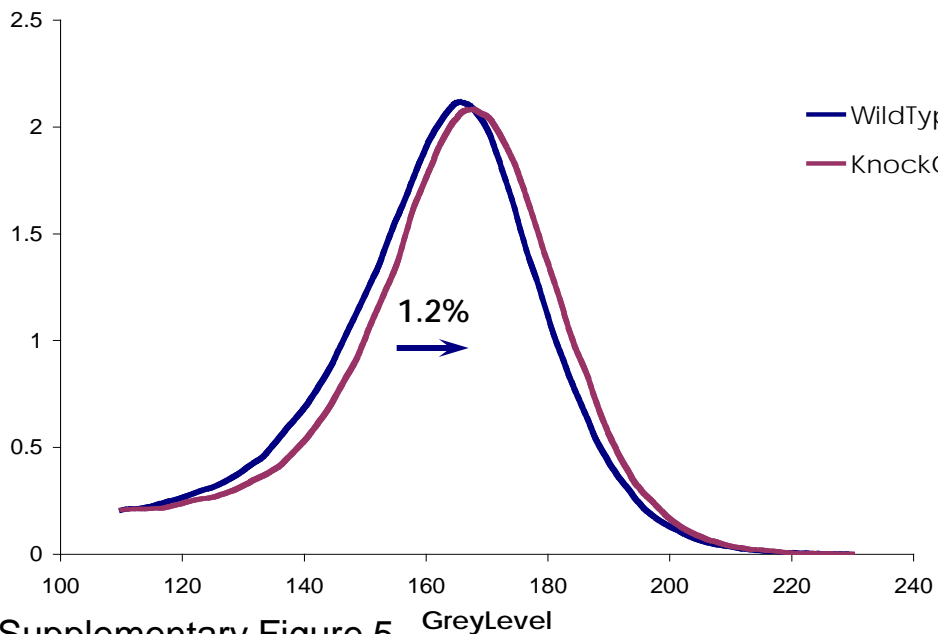

Average mineralization profiles for trabecular bone area in *Dpp4*<sup>+/+</sup> and *Dpp4*<sup>-/-</sup> mice

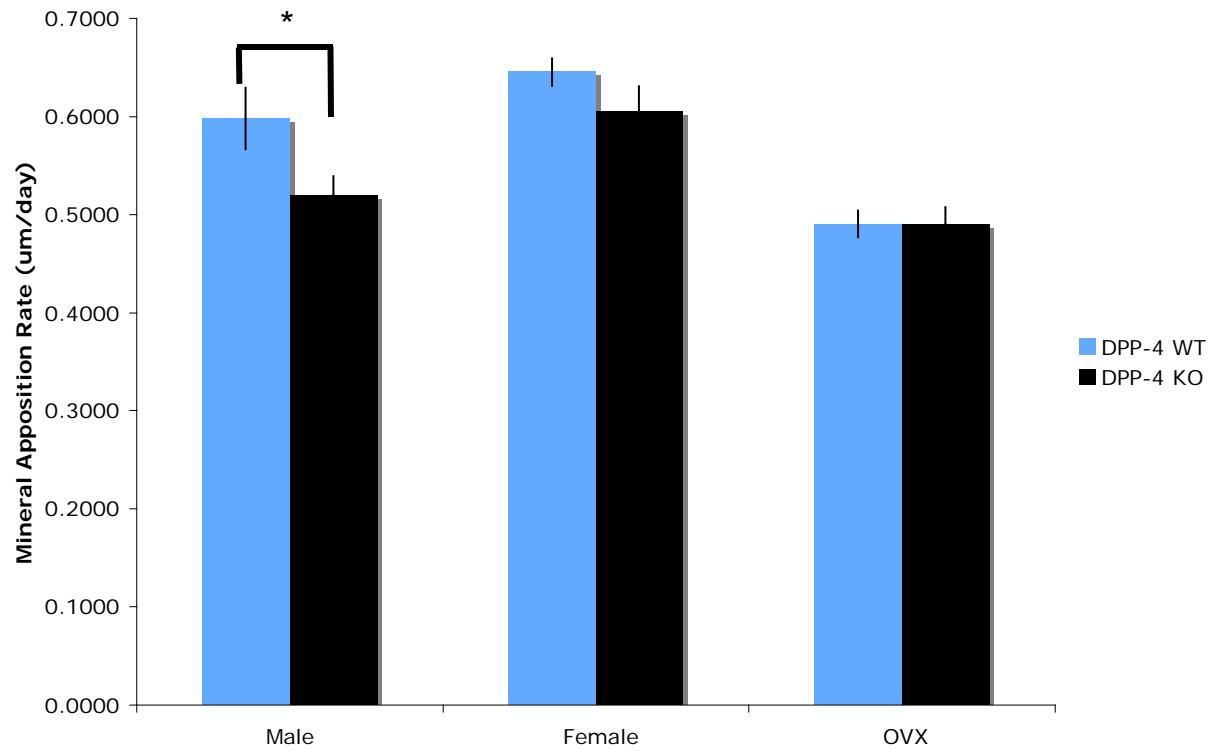

Supplement: NIHMS1744-supplement-1-6.pdf [file NIHMS1744-supplement-1-6.pdf]
