# Supplementary material
Source: PubMed Central journal article supplement (PMC3084690)
Supplement: NIHMS1744-supplement-1-15.pdf [file NIHMS1744-supplement-1-15.pdf]

**Supplemental Tables:**

**Supplemental Table 1. Geometrical properties of right femora for pioglitazone-treated and control mice**

|                                                   | Male          |               | Female        |               | OVX           |               |
|---------------------------------------------------|---------------|---------------|---------------|---------------|---------------|---------------|
|                                                   | Vehicle       | Pio           | Vehicle       | Pio           | Vehicle       | Pio           |
| n                                                 | 8             | 11            | 8             | 12            | 9             | 11            |
| <b>A-P</b>                                        |               |               |               |               |               |               |
| <b>Diameter (mm)</b>                              | 1.37 ± 0.03   | 1.32 ± 0.03   | 1.29 ± 0.01   | 1.29 ± 0.02   | 1.32 ± 0.02   | 1.29 ± 0.01   |
| <b>Moment of Inertia (mm<sup>4</sup>)</b>         | 0.244 ± 0.020 | 0.210 ± 0.024 | 0.189 ± 0.005 | 0.189 ± 0.005 | 0.177 ± 0.006 | 0.191 ± 0.007 |
| <b>Cross-sectional bone area (mm<sup>2</sup>)</b> | 1.16 ± 0.02   | 1.06 ± 0.05   | 1.10 ± 0.01   | 1.10 ± 0.02   | 0.99 ± 0.02   | 0.98 ± 0.02   |
| <b>Cortical Thickness (mm)</b>                    | 0.210 ± 0.003 | 0.201 ± 0.003 | 0.231 ± 0.002 | 0.236 ± 0.002 | 0.205 ± 0.004 | 0.200 ± 0.004 |

*Values reported as mean ± standard error.*

**Supplemental Table 2. Femoral three-point bending results for pioglitazone-treated and control mice**

|                                  | Male           |                | Female         |                | OVX            |                |
|----------------------------------|----------------|----------------|----------------|----------------|----------------|----------------|
|                                  | Vehicle        | Pio            | Vehicle        | Pio            | Vehicle        | Pio            |
| n                                | 8              | 10             | 8              | 12             | 9              | 11             |
| <b>Structural Properties</b>     |                |                |                |                |                |                |
| <b>Ultimate Load (N)</b>         | 20.3 ± 0.9     | 18.3 ± 0.6     | 24.5 ± 0.7     | 24.8 ± 0.9     | 16.3 ± 1.3     | 16.1 ± 1.0     |
| <b>Failure Displacement (mm)</b> | 0.55 ± 0.09    | 0.58 ± 0.06    | 0.43 ± 0.04    | 0.40 ± 0.03    | 0.30 ± 0.03    | 0.44 ± 0.08    |
| <b>Energy to Failure (mJ)</b>    | 8.2 ± 1.1      | 7.5 ± 0.8      | 7.3 ± 0.8      | 6.7 ± 0.4      | 3.2 ± 0.6      | 4.5 ± 0.8      |
| <b>Stiffness (N/mm)</b>          | 152.5 ± 6.4    | 137.8 ± 8.9    | 177.2 ± 5.5    | 165.1 ± 8.1    | 149.5 ± 5.5    | 149.7 ± 5.2    |
| <b>Material Properties</b>       |                |                |                |                |                |                |
| <b>Ultimate Stress (MPa)</b>     | 87.4 ± 4.2     | 94.8 ± 4.2     | 125.5 ± 5.8    | 126.8 ± 3.1    | 91.3 ± 6.1     | 92.5 ± 7.7     |
| <b>Failure Strain (%)</b>        | 12.5 ± 1.9     | 12.6 ± 1.6     | 9.1 ± 0.9      | 8.5 ± 0.6      | 6.6 ± 0.7      | 9.5 ± 1.7      |
| <b>Toughness (MPa)</b>           | 7.9 ± 1.0      | 8.3 ± 0.9      | 8.0 ± 0.9      | 7.4 ± 0.5      | 3.8 ± 0.7      | 4.8 ± 1.1      |
| <b>Young's Modulus (MPa)</b>     | 2905.8 ± 184.2 | 3420.0 ± 357.9 | 4224.9 ± 151.8 | 3923.5 ± 166.4 | 3820.3 ± 114.0 | 4035.4 ± 347.6 |

*Values reported as mean ± standard error.*

**Supplemental Table 3. Femoral neck fracture results for pioglitazone-treated and control mice**

|                                  | Male         |              | Female       |             | OVX          |             |
|----------------------------------|--------------|--------------|--------------|-------------|--------------|-------------|
|                                  | Vehicle      | Pio          | Vehicle      | Pio         | Vehicle      | Pio         |
| n                                | 8            | 11           | 8            | 12          | 9            | 11          |
| <b>Structural Properties</b>     |              |              |              |             |              |             |
| <b>Ultimate Load (N)</b>         | 26.3 ± 2.8   | 22.0 ± 1.4   | 21.5 ± 0.8   | 21.0 ± 1.3  | 15.9 ± 1.3   | 17.0 ± 0.9  |
| <b>Failure Displacement (mm)</b> | 0.26 ± 0.04  | 0.28 ± 0.03  | 0.21 ± 0.02  | 0.23 ± 0.02 | 0.22 ± 0.03  | 0.25 ± 0.03 |
| <b>Energy to Failure (mJ)</b>    | 3.7 ± 0.6    | 3.8 ± 0.5    | 2.8 ± 0.3    | 3.1 ± 0.4   | 2.1 ± 0.4    | 2.5 ± 0.3   |
| <b>Stiffness (N/mm)</b>          | 146.7 ± 12.8 | 130.7 ± 10.8 | 136.4 ± 12.7 | 136.2 ± 8.3 | 105.5 ± 10.6 | 102.5 ± 8.8 |

Values reported as mean ± standard error.

**Supplemental Table 4. Osteoclast staining in pioglitazone-treated and control mice**

|                                                                 | Male        |             | Female      |             | OVX         |             |
|-----------------------------------------------------------------|-------------|-------------|-------------|-------------|-------------|-------------|
|                                                                 | Vehicle     | Pio         | Vehicle     | Pio         | Vehicle     | Pio         |
| n                                                               | 7           | 11          | 8           | 12          | 9           | 11          |
| <b>Number of Osteoclasts (-)</b>                                | 43 ± 5      | 56 ± 5      | 64 ± 6      | 64 ± 5      | 45 ± 4      | 36 ± 4      |
| <b>Osteoclast Surface (mm)</b>                                  | 0.99 ± 0.16 | 1.12 ± 0.09 | 1.28 ± 0.10 | 1.67 ± 0.16 | 0.93 ± 0.11 | 0.76 ± 0.09 |
| <b>Percent Osteoclast Surface (%)</b>                           | 8.2 ± 1.5   | 9.0 ± 0.7   | 13.4 ± 1.8  | 17.3 ± 1.7  | 10.1 ± 1.4  | 9.8 ± 1.0   |
| <b>Number of Osteoclasts per Bone Surface (mm<sup>-1</sup>)</b> | 3.5 ± 0.4   | 4.5 ± 0.3   | 6.7 ± 1.0   | 6.6 ± 0.4   | 4.9 ± 0.5   | 4.6 ± 0.5   |
| <b>Number of Osteoclasts per Osteoclast Surface</b>             | 45.8 ± 2.9  | 50.5 ± 2.4  | 50.5 ± 4.6  | 39.5 ± 1.6* | 52.5 ± 5.9  | 48.6 ± 3.9  |

Values reported as mean ± standard error. \* Significant ( $p \leq 0.05$ ) compared to vehicle-treated controls

**Supplemental Table 5. Geometrical properties of right femora for sitagliptin-treated and control vehicle-treated mice**

|                                                   | Male          |               | Female        |               | OVX           |               |
|---------------------------------------------------|---------------|---------------|---------------|---------------|---------------|---------------|
|                                                   | Vehicle       | Sitagliptin   | Vehicle       | Sitagliptin   | Vehicle       | Sitagliptin   |
| <b>n</b>                                          | <b>11</b>     | <b>10</b>     | <b>8</b>      | <b>8</b>      | <b>9</b>      | <b>12</b>     |
| <b>A-P Diameter (mm)</b>                          | 1.30 ± 0.03   | 1.31 ± 0.02   | 1.29 ± 0.01   | 1.32 ± 0.02   | 1.32 ± 0.02   | 1.30 ± 0.01   |
| <b>Moment of Inertia (mm<sup>4</sup>)</b>         | 0.158 ± 0.011 | 0.165 ± 0.010 | 0.189 ± 0.005 | 0.198 ± 0.005 | 0.177 ± 0.006 | 0.184 ± 0.006 |
| <b>Cross-sectional bone area (mm<sup>2</sup>)</b> | 0.87 ± 0.02   | 0.99 ± 0.10   | 1.10 ± 0.01   | 1.12 ± 0.02   | 0.99 ± 0.02   | 0.97 ± 0.01   |
| <b>Cortical Thickness (mm)</b>                    | 0.167 ± 0.012 | 0.168 ± 0.003 | 0.231 ± 0.002 | 0.234 ± 0.003 | 0.205 ± 0.004 | 0.200 ± 0.003 |

*Values reported as mean ± standard error.*

**Supplemental Table 6. Femoral three-point bending results for sitagliptin-treated and vehicle-treated control mice**

|                                  | Male           |                | Female         |                | OVX            |                |
|----------------------------------|----------------|----------------|----------------|----------------|----------------|----------------|
|                                  | Vehicle        | Sitagliptin    | Vehicle        | Sitagliptin    | Vehicle        | Sitagliptin    |
| n                                | 11             | 10             | 8              | 8              | 9              | 12             |
| <b>Structural Properties</b>     |                |                |                |                |                |                |
| <b>Ultimate Load (N)</b>         | 17.7 ± 0.6     | 17.9 ± 0.6     | 24.5 ± 0.7     | 23.6 ± 0.9     | 16.3 ± 1.3     | 17.3 ± 0.5     |
| <b>Failure Displacement (mm)</b> | 0.51 ± 0.07    | 0.53 ± 0.06    | 0.43 ± 0.04    | 0.53 ± 0.08    | 0.30 ± 0.03    | 0.33 ± 0.04    |
| <b>Energy to Failure (mJ)</b>    | 6.1 ± 0.8      | 6.3 ± 0.7      | 7.3 ± 0.8      | 7.8 ± 0.9      | 3.2 ± 0.6      | 3.7 ± 0.5      |
| <b>Stiffness (N/mm)</b>          | 123.7 ± 5.8    | 129.0 ± 3.7    | 177.2 ± 5.5    | 179.6 ± 10.9   | 149.5 ± 5.5    | 144.9 ± 4.2    |
| <b>Material Properties</b>       |                |                |                |                |                |                |
| <b>Ultimate Stress (MPa)</b>     | 124.4 ± 7.2    | 114.3 ± 3.2    | 94.4 ± 5.8     | 117.8 ± 4.6    | 91.3 ± 6.1     | 92.2 ± 3.3     |
| <b>Failure Strain (%)</b>        | 10.6 ± 1.4     | 11.6 ± 1.3     | 9.1 ± 0.9      | 11.6 ± 1.7     | 6.6 ± 0.7      | 7.1 ± 0.8      |
| <b>Toughness (MPa)</b>           | 9.2 ± 1.3      | 8.7 ± 0.9      | 8.0 ± 0.9      | 8.7 ± 1.1      | 3.8 ± 0.7      | 4.3 ± 0.6      |
| <b>Young's Modulus (MPa)</b>     | 4205.4 ± 391.4 | 3784.2 ± 154.4 | 4224.9 ± 151.8 | 4077.7 ± 222.9 | 3820.3 ± 114.0 | 3569.6 ± 136.1 |

*Values reported as mean ± standard error.*

Supplemental Table 7. Femoral neck fracture results for sitagliptin-treated and vehicle-treated control mice

|                                  | Male        |             | Female       |              | OVX          |             |
|----------------------------------|-------------|-------------|--------------|--------------|--------------|-------------|
|                                  | Vehicle     | Sitagliptin | Vehicle      | Sitagliptin  | Vehicle      | Sitagliptin |
| n                                | 11          | 10          | 8            | 8            | 9            | 10          |
| <b>Structural Properties</b>     |             |             |              |              |              |             |
| <b>Ultimate Load (N)</b>         | 20.4 ± 2.1  | 20.0 ± 1.7  | 21.5 ± 0.8   | 21.1 ± 1.5   | 15.9 ± 1.3   | 14.9 ± 1.0  |
| <b>Failure Displacement (mm)</b> | 0.31 ± 0.03 | 0.33 ± 0.02 | 0.21 ± 0.02  | 0.28 ± 0.02  | 0.22 ± 0.03  | 0.18 ± 0.01 |
| <b>Energy to Failure (mJ)</b>    | 4.0 ± 0.6   | 4.0 ± 0.3   | 2.8 ± 0.3    | 3.7 ± 0.5    | 2.1 ± 0.4    | 1.6 ± 0.2   |
| <b>Stiffness (N/mm)</b>          | 112.3 ± 5.4 | 102.6 ± 6.1 | 136.4 ± 12.7 | 132.3 ± 11.2 | 105.5 ± 10.6 | 99.2 ± 4.9  |

Values reported as mean ± standard error.

**Supplemental Table 8. Vertebral Compression for sitagliptin-treated and control mice**

|                                  | Male         |              | Female       |              | OVX           |               |
|----------------------------------|--------------|--------------|--------------|--------------|---------------|---------------|
|                                  | Vehicle      | Sitagliptin  | Vehicle      | Sitagliptin  | Vehicle       | Sitagliptin   |
| <b>n</b>                         | <b>11</b>    | <b>10</b>    | <b>8</b>     | <b>8</b>     | <b>11</b>     | <b>10</b>     |
| <b>Structural Properties</b>     |              |              |              |              |               |               |
| <b>Ultimate Load (N)</b>         | 30.7 ± 2.5   | 30.2 ± 2.3   | 25.8 ± 2.5   | 25.3 ± 2.9   | 19.9 ± 2.1    | 15.1 ± 1.8    |
| <b>Failure Displacement (mm)</b> | 0.31 ± 0.02  | 0.35 ± 0.03  | 0.42 ± 0.07  | 0.42 ± 0.08  | 0.37 ± 0.05   | 0.39 ± 0.05   |
| <b>Energy to Failure (mJ)</b>    | 5.4 ± 0.5    | 6.0 ± 0.4    | 6.9 ± 1.4    | 6.5 ± 1.2    | 4.3 ± 0.8     | 3.7 ± 0.6     |
| <b>Stiffness (N/mm)</b>          | 161.3 ± 17.0 | 149.2 ± 19.2 | 113.3 ± 11.1 | 87.4 ± 13.1  | 108.8 ± 17.6  | 76.5 ± 13.0   |
| <b>Material Properties</b>       |              |              |              |              |               |               |
| <b>Ultimate Stress (MPa)</b>     | 13.7 ± 1.1   | 12.8 ± 1.1   | 10.3 ± 1.1   | 10.8 ± 1.3   | 9.3 ± 0.9     | 6.4 ± 0.8     |
| <b>Failure Strain (%)</b>        | 10.4 ± 0.6   | 11.2 ± 0.9   | 13.1 ± 2.2   | 12.5 ± 2.0   | 11.9 ± 1.6    | 12.6 ± 1.8    |
| <b>Toughness (MPa)</b>           | 0.81 ± 0.07  | 0.83 ± 0.07  | 0.87 ± 0.18  | 0.86 ± 0.18  | 0.64 ± 0.12   | 0.50 ± 0.08   |
| <b>Young's Modulus (MPa)</b>     | 211.3 ± 20.8 | 192.9 ± 24.6 | 145.9 ± 15.8 | 123.7 ± 18.5 | 162.9 ± 29.18 | 105.6 ± 19.1* |

Values reported as mean ± standard error. \* Significant ( $p \leq 0.05$ ) compared to vehicle-treated control mice

**Supplemental Table 9. Osteoclast staining results for sitagliptin-treated and control mice**

|                                                                       | Male       |             | Female     |             | OVX         |             |
|-----------------------------------------------------------------------|------------|-------------|------------|-------------|-------------|-------------|
|                                                                       | Vehicle    | Sitagliptin | Vehicle    | Sitagliptin | Vehicle     | Sitagliptin |
| n                                                                     | 9          | 10          | 8          | 8           | 9           | 11          |
| <b>Number of Osteoclasts (-)</b>                                      | 66 ± 6     | 61 ± 6      | 64 ± 6     | 53 ± 7      | 45 ± 4      | 52 ± 6      |
| <b>Osteoclast Surface (mm)</b>                                        | 1.2 ± 0.1  | 1.1 ± 0.1   | 1.3 ± 0.1  | 1.3 ± 0.3   | 0.93 ± 0.11 | 1.5 ± 0.3   |
| <b>Percent Osteoclast Surface (%)</b>                                 | 7.1 ± 1.0  | 6.2 ± 0.7   | 13.4 ± 1.8 | 14.0 ± 2.2  | 10.1 ± 1.4  | 12.8 ± 1.9  |
| <b>Number of Osteoclasts per Bone Surface (mm<sup>-1</sup>)</b>       | 3.9 ± 0.5  | 3.4 ± 0.4   | 6.7 ± 1.0  | 5.7 ± 0.6   | 4.9 ± 0.5   | 4.6 ± 0.5   |
| <b>Number of Osteoclasts per Osteoclast Surface (mm<sup>-1</sup>)</b> | 56.7 ± 2.1 | 55.3 ± 1.0  | 50.5 ± 4.6 | 42.9 ± 2.7  | 52.5 ± 5.9  | 39.3 ± 3.8  |

*Values reported as mean ± standard error.*



**Supplementary Table 10. Femoral three-point bending results for Dpp4<sup>-/-</sup> (KO) and WT mice**

|                                  | Male           |                | Female         |                | OVX            |                |
|----------------------------------|----------------|----------------|----------------|----------------|----------------|----------------|
|                                  | WT             | KO             | WT             | KO             | WT             | KO             |
| n                                | 14             | 23             | 14             | 17             | 10             | 13             |
| <b>Structural Properties</b>     |                |                |                |                |                |                |
| <b>Ultimate Load (N)</b>         | 17.0 ± 0.6     | 16.2 ± 0.5     | 20.8 ± 0.9     | 20.8 ± 0.7     | 16.9 ± 0.7     | 15.5 ± 0.7     |
| <b>Failure Displacement (mm)</b> | 0.70 ± 0.11    | 0.55 ± 0.06    | 0.30 ± 0.04    | 0.41 ± 0.04    | 0.29 ± 0.04    | 0.34 ± 0.04    |
| <b>Energy to Failure (mJ)</b>    | 7.9 ± 1.0      | 6.1 ± 0.6      | 4.3 ± 0.7      | 5.7 ± 0.65     | 3.5 ± 0.6      | 3.4 ± 0.5      |
| <b>Stiffness (N/mm)</b>          | 139.3 ± 3.7    | 132.7 ± 5.6    | 165.2 ± 6.6    | 163.0 ± 6.8    | 154.7 ± 3.6    | 131.1 ± 6.6*   |
| <b>Material Properties</b>       |                |                |                |                |                |                |
| <b>Ultimate Stress (MPa)</b>     | 105.6 ± 3.9    | 99.4 ± 4.1     | 147.7 ± 5.3    | 147.7 ± 4.8    | 115.8 ± 6.8    | 129.5 ± 7.3    |
| <b>Failure Strain (%)</b>        | 14.7 ± 2.6     | 13.1 ± 1.5     | 6.7 ± 0.8      | 9.2 ± 1.0      | 6.6 ± 0.8      | 7.5 ± 1.0      |
| <b>Toughness (Mpa)</b>           | 10.9 ± 1.5     | 8.7 ± 0.9      | 6.8 ± 1.1      | 9.2 ± 1.1      | 5.5 ± 0.9      | 7.0 ± 1.0      |
| <b>Young's Modulus (Mpa)</b>     | 3889.7 ± 260.1 | 3534.8 ± 214.7 | 5253.4 ± 243.1 | 5141.4 ± 255.5 | 4546.0 ± 163.6 | 5028.1 ± 214.2 |

Values reported as mean ± standard error. \* Significant ( $p \leq 0.05$ ) compared to wildtype control

**Supplementary Table 11. Femoral neck fracture results for Dpp4<sup>-/-</sup> (KO) and WT mice**

|                                  | Male        |             | Female       |             | OVX         |             |
|----------------------------------|-------------|-------------|--------------|-------------|-------------|-------------|
|                                  | WT          | KO          | WT           | KO          | WT          | KO          |
| n                                | 14          | 23          | 13           | 16          | 10          | 13          |
| <b>Structural Properties</b>     |             |             |              |             |             |             |
| <b>Ultimate Load (N)</b>         | 22.5 ± 0.9  | 22.6 ± 1.0  | 17.8 ± 0.8   | 17.5 ± 0.9  | 18.1 ± 0.7  | 13.3 ± 0.5* |
| <b>Failure Displacement (mm)</b> | 0.27 ± 0.03 | 0.26 ± 0.02 | 0.23 ± 0.03  | 0.30 ± 0.04 | 0.28 ± 0.02 | 0.26 ± 0.02 |
| <b>Energy to Failure (mJ)</b>    | 3.4 ± 0.3   | 3.2 ± 0.2   | 2.4 ± 0.3    | 3.2 ± 0.4   | 2.9 ± 0.2   | 2.1 ± 0.2*  |
| <b>Stiffness (N/mm)</b>          | 121.7 ± 8.8 | 135.5 ± 9.7 | 115.8 ± 11.3 | 104.2 ± 8.8 | 114.5 ± 4.8 | 83.0 ± 4.7* |

Values reported as mean ± standard error. \* Significant ( $p \leq 0.05$ ) compared to wildtype control

**Supplemental Table 12. Vertebral compression results for Dpp4<sup>-/-</sup> (KO) and WT mice**

|                                  | Male         |              | Female       |               | OVX          |              |
|----------------------------------|--------------|--------------|--------------|---------------|--------------|--------------|
|                                  | WT           | KO           | WT           | KO            | WT           | KO           |
| n                                | 13           | 21           | 12           | 19            | 9            | 13           |
| <b>Structural Properties</b>     |              |              |              |               |              |              |
| <b>Ultimate Load (N)</b>         | 24.1 ± 2.9   | 17.2 ± 1.3*  | 17.7 ± 2.2   | 19.7 ± 1.6    | 18.6 ± 1.5   | 14.4 ± 2.2   |
| <b>Failure Displacement (mm)</b> | 0.34 ± 0.05  | 0.34 ± 0.09  | 0.36 ± 0.06  | 0.36 ± 0.04   | 0.39 ± 0.05  | 0.38 ± 0.05  |
| <b>Energy to Failure (mJ)</b>    | 5.0 ± 1.0    | 3.8 ± 0.5    | 4.1 ± 0.8    | 4.4 ± 0.7     | 4.8 ± 0.9    | 3.9 ± 0.9    |
| <b>Stiffness (N/mm)</b>          | 129.4 ± 20.6 | 83.8 ± 7.4   | 83.8 ± 11.3  | 114.1 ± 10.0  | 89.1 ± 10.5  | 74.1 ± 9.7   |
| <b>Material Properties</b>       |              |              |              |               |              |              |
| <b>Ultimate Stress (Mpa)</b>     | 9.8 ± 1.3    | 7.3 ± 0.5    | 7.4 ± 0.9    | 8.5 ± 0.7     | 8.0 ± 0.7    | 6.5 ± 1.0    |
| <b>Failure Strain (%)</b>        | 10.4 ± 1.5   | 10.5 ± 0.9   | 11.2 ± 1.7   | 10.1 ± 1.2    | 12.6 ± 1.5   | 12.2 ± 1.5   |
| <b>Toughness (Mpa)</b>           | 0.62 ± 0.11  | 0.49 ± 0.06  | 0.54 ± 0.10  | 0.55 ± 0.09   | 0.68 ± 0.14  | 0.56 ± 0.13  |
| <b>Young's Modulus (Mpa)</b>     | 169.1 ± 27.1 | 118.8 ± 11.5 | 113.4 ± 16.5 | 161.5 ± 13.9* | 119.4 ± 16.2 | 103.2 ± 15.0 |

Values reported as mean ± standard error. \* Significant ( $p \leq 0.05$ ) compared to wildtype control

**Supplemental Table 13. Vertebral trabecular architecture in Dpp4<sup>-/-</sup> (KO) and WT mice**

|                                | Male         |             | Female       |              | OVX          |              |
|--------------------------------|--------------|-------------|--------------|--------------|--------------|--------------|
|                                | WT           | KO          | WT           | KO           | WT           | KO           |
| n                              | 15           | 23          | 13           | 16           | 10           | 13           |
| <b>BV/TV (%)</b>               | 26.2 ± 1.4   | 25.2 ± 0.9  | 23.8 ± 1.5   | 20.4 ± 0.9   | 19.5 ± 1.3   | 19.1 ± 1.1   |
| <b>Tb.Th. (μm)</b>             | 68.2 ± 0.7   | 65.1 ± 1.0* | 66.7 ± 1.4   | 66.9 ± 0.9   | 62.1 ± 0.7   | 60.6 ± 0.7   |
| <b>Tb.N. (mm<sup>-1</sup>)</b> | 3.8 ± 0.2    | 3.9 ± 0.1   | 3.6 ± 0.2    | 2.9 ± 0.2*   | 3.1 ± 0.2    | 3.2 ± 0.2    |
| <b>Tb.Sp. (μm)</b>             | 199.9 ± 13.1 | 200.2 ± 4.9 | 260.8 ± 18.8 | 272.0 ± 17.3 | 223.4 ± 23.0 | 223.4 ± 20.4 |

Values reported as mean ± standard error. \* Significant ( $p \leq 0.05$ ) compared to wildtype control

**Supplemental Table 14. Vertebral trabecular connectivity for Dpp4<sup>-/-</sup> (KO) and WT mice**

|                                    | Male                                                  |             | Female      |             | OVX          |             |             |
|------------------------------------|-------------------------------------------------------|-------------|-------------|-------------|--------------|-------------|-------------|
|                                    | WT                                                    | KO          | WT          | KO          | WT           | KO          |             |
| n                                  | 15                                                    | 22          | 13          | 18          | 10           | 11          |             |
| <b>Measures of Connectivity</b>    | <b>Total Strut Length (mm/mm<sup>2</sup>)</b>         | 4.70 ± 0.22 | 4.63 ± 0.18 | 3.94 ± 0.22 | 3.94 ± 0.30  | 3.21 ± 0.20 | 2.99 ± 0.16 |
|                                    | <b>Number of Nodes (mm<sup>-2</sup>)</b>              | 8.8 ± 0.6   | 9.4 ± 0.8   | 10.0 ± 1.4  | 10.3 ± 1.6   | 5.9 ± 0.8   | 5.2 ± 0.6   |
|                                    | <b>Length of Node-Node Struts (mm/mm<sup>2</sup>)</b> | 1.21 ± 0.21 | 1.12 ± 0.15 | 1.02 ± 0.16 | 1.25 ± 0.22  | 0.78 ± 0.19 | 0.54 ± 0.10 |
| <b>Measures of Disconnectivity</b> | <b>Length of Node-Free Struts (mm/mm<sup>2</sup>)</b> | 1.57 ± 0.12 | 1.54 ± 0.10 | 1.56 ± 0.16 | 0.98 ± 0.07* | 1.03 ± 0.10 | 0.94 ± 0.12 |
|                                    | <b>Number of Free Ends (mm<sup>-2</sup>)</b>          | 15.3 ± 0.8  | 14.9 ± 0.6  | 14.7 ± 1.7  | 12.9 ± 1.0   | 10.6 ± 0.4  | 10.5 ± 0.4  |
|                                    | <b>Length of Free-Free Struts (mm/mm<sup>2</sup>)</b> | 0.60 ± 0.08 | 0.67 ± 0.08 | 0.49 ± 0.05 | 0.56 ± 0.07  | 0.46 ± 0.05 | 0.51 ± 0.07 |

Values reported as mean ± standard error. \* Significant ( $p \leq 0.05$ ) compared to wildtype control

**Supplemental Table 15. Osteoclast staining for Dpp4<sup>-/-</sup> (KO) and WT mice**

|                                                                 | Male        |             | Female     |             | OVX         |             |
|-----------------------------------------------------------------|-------------|-------------|------------|-------------|-------------|-------------|
|                                                                 | WT          | KO          | WT         | KO          | WT          | KO          |
| n                                                               | 9           | 9           | 8          | 13          | 9           | 13          |
| <b>Number of Osteoclasts (-)</b>                                | 55 ± 6      | 43 ± 5      | 74 ± 10    | 60 ± 4      | 51 ± 5      | 55 ± 5      |
| <b>Osteoclast Surface (mm)</b>                                  | 0.89 ± 0.15 | 0.60 ± 0.08 | 1.1 ± 0.2  | 0.93 ± 0.06 | 0.96 ± 0.13 | 0.91 ± 0.07 |
| <b>Percent Osteoclast Surface (%)</b>                           | 5.6 ± 0.8   | 3.9 ± 0.4   | 8.6 ± 1.4  | 8.3 ± 0.9   | 7.3 ± 0.7   | 7.6 ± 0.6   |
| <b>Number of Osteoclasts per Bone Surface (mm<sup>-1</sup>)</b> | 3.6 ± 0.4   | 2.8 ± 0.3   | 5.9 ± 0.9  | 5.3 ± 0.4   | 4.0 ± 0.4   | 4.5 ± 0.3   |
| <b>Number of Osteoclasts per Osteoclast Surface</b>             | 66.7 ± 3.8  | 72.7 ± 2.7  | 69.7 ± 2.9 | 65.4 ± 2.0  | 59.5 ± 2.1  | 60.2 ± 2.0  |

*Values reported as mean ± standard error*
